# Supplementary material for: Genome-wide genetic analyses highlight mitogen-activated protein kinase (MAPK) signaling in the pathogenesis of endometriosis
Source: PubMed Central journal article supplement (PMC5400041; doi:10.1093/humrep/dex024), 2017-02-09
Supplement: dex024suppl_figure1.pdf [file dex024suppl_figure1.pdf]

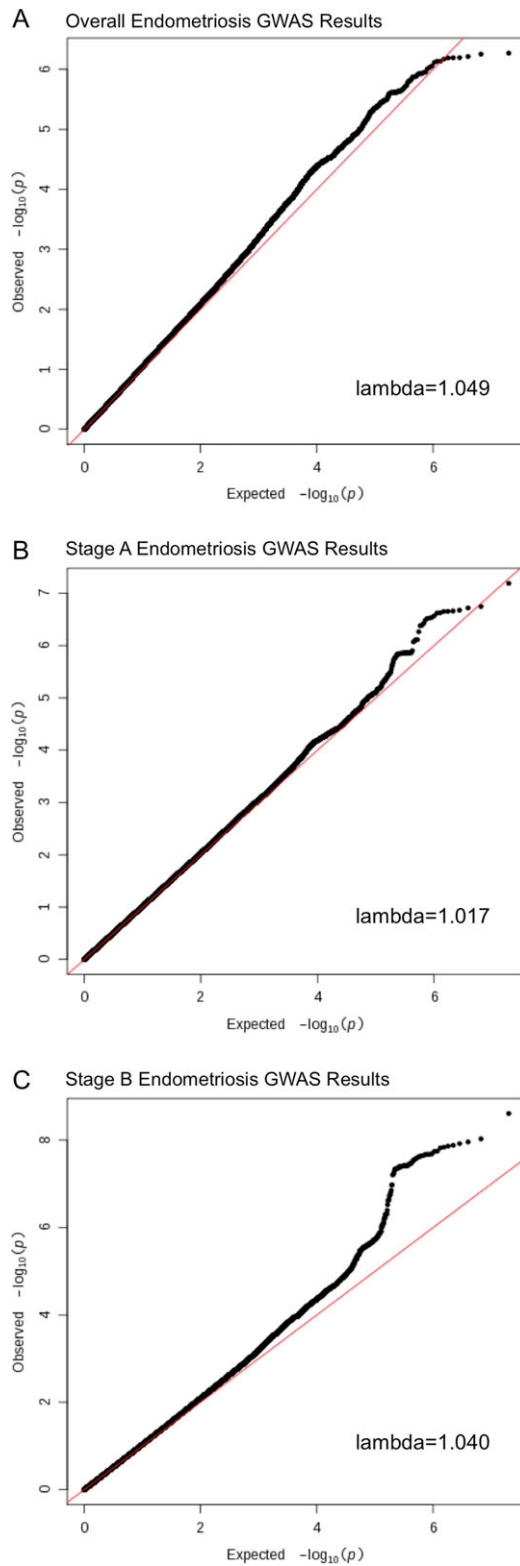

**Supplementary Figure S1** QQ plots assessing genomic inflation of observed vs. expected genome-wide association study (GWAS)  $P$ -values for **(A)** overall endometriosis results, **(B)** Stage A endometriosis results and **(C)** Stage B endometriosis results.
