# Supplementary material for: Genome-wide genetic analyses highlight mitogen-activated protein kinase (MAPK) signaling in the pathogenesis of endometriosis
Source: PubMed Central journal article supplement (PMC5400041; doi:10.1093/humrep/dex024), 2017-02-09
Supplement: dex024suppl_figure2.pdf [file dex024suppl_figure2.pdf]

**A**

**GWAS**  
 International EndoGene Consortium (IEC)  
 3,194 cases and 7,060 controls  
 Analysis tier  
 Overall vs. controls  
 Stage A vs. controls  
 Stage B vs. controls

**MSigDB**  
 (1) Curated Canonical pathways:  
 BioCarta; KEGG<sup>a</sup>; Matrisome; PID<sup>b</sup>;  
 Reactome; SA<sup>c</sup>; SIG<sup>d</sup>; ST<sup>e</sup>;  
 SuperArray  
 1,330 gene sets  
 (2) Gene Ontology (GO) gene sets:  
 1,454 gene sets  
**PANTHER**  
 149 pathways  
 TOTAL 2,860 gene sets  
 (gene set size >10 tested)

**MAGENTA Software**  
 Algorithm  
 STEP 1 – map SNP's onto genes  
 STEP 2 – score genes based on  
 regional SNP p-values  
 STEP 3 – correct for gene score  
 confounders  
 STEP 4 – estimate gene set  
 enrichment P-value for gene  
 sets of interest<sup>f</sup>

**RESULTS** of enriched pathways for  
 (1) Overall endometriosis  
 (2) Stage A endometriosis  
 (3) Stage B endometriosis

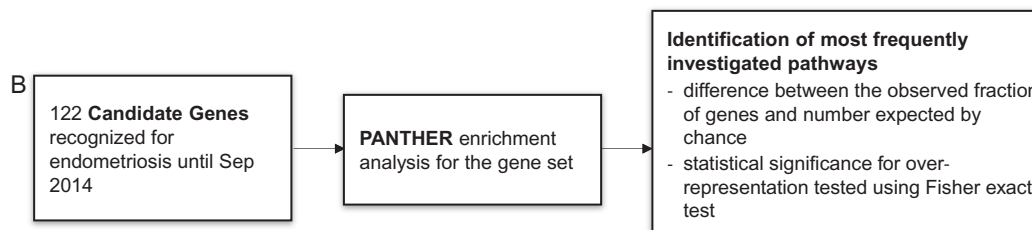

**Supplementary Figure S2** Study designs for (A) the GWAS pathway analysis on endometriosis and (B) identification of pathways that have been investigated indirectly through candidate gene association studies for endometriosis. <sup>a</sup>Kyoto Encyclopedia of Genes and Genomes; <sup>b</sup>Pathway Interaction Database; <sup>c</sup>SigmaAldrich; <sup>d</sup>Signaling Gateway; <sup>e</sup>Signal Transduction; <sup>f</sup>Segre *et al. PLoS Genetics*, 2010.
