# Supplementary material for: Genome-wide genetic analyses highlight mitogen-activated protein kinase (MAPK) signaling in the pathogenesis of endometriosis
Source: PubMed Central journal article supplement (PMC5400041; doi:10.1093/humrep/dex024), 2017-02-09
Supplement: dex024suppl_figure3.pdf [file dex024suppl_figure3.pdf]

(a) **Manhattan Plot Overall Results** (*Info* = 0.8)

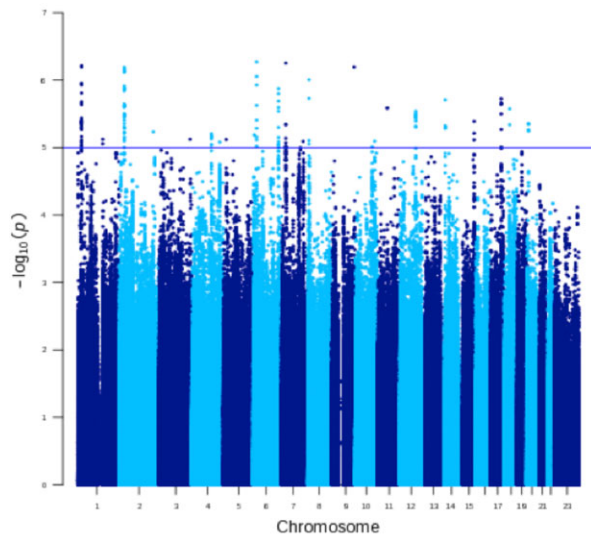

(b) **Stage B Endometriosis** (*Info* = 0.8)

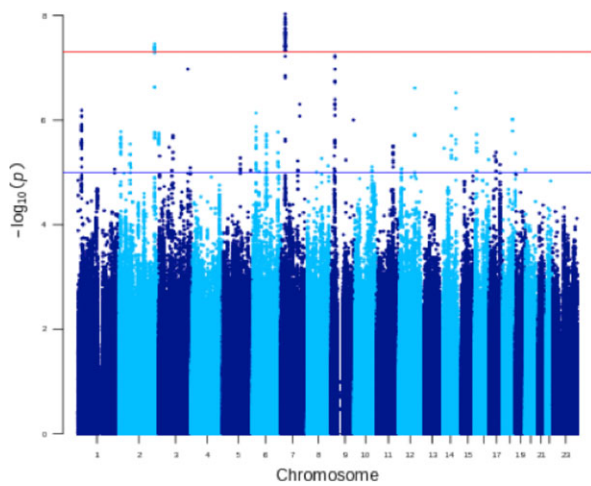

**Supplementary Figure S3** Manhattan plots of association of single-nucleotide polymorphisms (SNPs) with (a) all and (b) stage B endometriosis in the GWAS. Red horizontal line marks the genome-wide significance ( $P < 5 \times 10^{-8}$ ), and blue line marks nominal significance ( $P < 5 \times 10^{-6}$ ).
