# Supplementary material for: Genome-wide genetic analyses highlight mitogen-activated protein kinase (MAPK) signaling in the pathogenesis of endometriosis
Source: PubMed Central journal article supplement (PMC5400041; doi:10.1093/humrep/dex024), 2017-02-09
Supplement: dex024suppl_table1.pdf [file dex024suppl_table1.pdf]

**Supplementary Table S1 Study population for genome-wide association study (GWAS).**

| The International Endogene Consortium, IEC | Patients (n) |           | Patients (%) |
|--------------------------------------------|--------------|-----------|--------------|
|                                            | UK           | Australia |              |
| Surgically confirmed cases                 |              |           |              |
| Stage A (I–II)                             | 329          | 1357      | 52.7         |
| Stage B (III–IV)                           | 454          | 910       | 42.7         |
| Unclassified                               | 141          | 3         | 4.6          |
| Total                                      | 924          | 2270      | 100          |
| Controls                                   | 5190         | 1870      |              |

Endometriosis cases were classified according to the revised American Fertility Society (rAFS) classification through assessment of surgical records.
