# Supplementary material for: Genome-wide genetic analyses highlight mitogen-activated protein kinase (MAPK) signaling in the pathogenesis of endometriosis
Source: PubMed Central journal article supplement (PMC5400041; doi:10.1093/humrep/dex024), 2017-02-09
Supplement: dex024suppl_table2.pdf [file dex024suppl_table2.pdf]

**Supplementary Table SII Differential expression analysis in eutopic endometrium including 77 endometriosis cases and 71 controls.**

| GWAS analysis     | Gene                       | Probe_ID*    | Adj-P-Val             | P-value               | Beta   | logFC                  |
|-------------------|----------------------------|--------------|-----------------------|-----------------------|--------|------------------------|
| Overall GWAS Loci | <i>ID4</i>                 |              |                       |                       |        |                        |
|                   | Overall                    | 229386_at    | $8.53 \times 10^{-3}$ | $1.41 \times 10^{-3}$ | -1.458 | -0.43                  |
|                   | Stage B                    | 229386_at    | 0.011                 | $8.00 \times 10^{-4}$ | -0.897 | 0.54                   |
|                   | Stage A                    | 229386_at    | 0.16                  | 0.077                 | -4.973 | 0.29                   |
|                   | <i>NFE2L3</i>              |              |                       |                       |        |                        |
|                   | Overall                    | 204702_s_at  | 0.031                 | $7.79 \times 10^{-3}$ | -2.991 | 0.34                   |
|                   | Stage B                    | 204702_s_at  | 0.24                  | 0.091                 | -5.029 | -0.27                  |
|                   | Stage A                    | 204702_s_at  | 0.031                 | 0.011                 | -3.289 | -0.45                  |
|                   | <i>WNT4</i>                |              |                       |                       |        |                        |
|                   | Overall                    | 1556689_a_at | 0.15                  | 0.064                 | -4.795 | -0.32                  |
|                   | Stage B                    | 1556689_a_at | 1                     | 0.96                  | -6.440 | $-8.04 \times 10^{-3}$ |
|                   | Stage A                    | 1556689_a_at | $2.30 \times 10^{-3}$ | $4.09 \times 10^{-4}$ | -0.322 | 0.89                   |
|                   | <i>LAMC3</i>               |              |                       |                       |        |                        |
|                   | Overall                    | 219407_s_at  | 0.33                  | 0.19                  | -5.651 | -0.32                  |
|                   | Stage B                    | 219407_s_at  | 0.93                  | 0.84                  | -6.420 | -0.057                 |
|                   | Stage A                    | 219407_s_at  | 0.018                 | $5.43 \times 10^{-3}$ | -2.684 | 0.91                   |
|                   | <i>CAPN14</i>              |              |                       |                       |        |                        |
|                   | Overall                    | 1557321_a_at | 0.51                  | 0.36                  | -6.077 | 0.083                  |
|                   | Stage B                    | 1557321_a_at | 0.51                  | 0.31                  | -5.926 | -0.11                  |
|                   | Stage A                    |              |                       |                       |        |                        |
|                   | <i>DEFA1</i>               |              |                       |                       |        |                        |
| Overall           | 205033_s_at                | 0.54         | 0.40                  | -6.131                | 0.16   |                        |
| Stage B           | 205033_s_at                | 0.59         | 0.40                  | -6.083                | -0.18  |                        |
| Stage A           |                            |              |                       |                       |        |                        |
| Stage A GWAS Loci | <i>MAP3K4</i>              |              |                       |                       |        |                        |
|                   | Overall                    | 216199_s_at  | $7.12 \times 10^{-3}$ | $1.11 \times 10^{-3}$ | -1.242 | 0.60                   |
|                   | Stage B                    | 216199_s_at  | 0.26                  | 0.10                  | -5.122 | -0.31                  |
|                   | Stage A                    | 216199_s_at  | $3.76 \times 10^{-4}$ | $2.44 \times 10^{-5}$ | 2.310  | -1.03                  |
|                   | <i>CDC73</i>               |              |                       |                       |        |                        |
|                   | Overall                    | 235196_at    | $3.97 \times 10^{-4}$ | $1.78 \times 10^{-5}$ | 2.591  | 0.67                   |
|                   | Stage B                    | 235196_at    | 0.021                 | $2.15 \times 10^{-3}$ | -1.797 | -0.53                  |
|                   | Stage A                    | 235196_at    | $2.58 \times 10^{-4}$ | $1.21 \times 10^{-5}$ | 2.971  | -0.88                  |
|                   | <i>CSMD1</i>               |              |                       |                       |        |                        |
|                   | Overall                    | 1553405_a_at | 0.027                 | $6.50 \times 10^{-3}$ | -2.831 | -0.15                  |
|                   | Stage B                    | 1553405_a_at | 0.061                 | 0.011                 | -3.241 | 0.15                   |
|                   | Stage A                    | 1553405_a_at | 0.031                 | 0.011                 | -3.267 | 0.15                   |
|                   | <i>EMX2OS (Anti-sense)</i> |              |                       |                       |        |                        |
|                   | Overall                    | 230963_at    | 0.27                  | 0.15                  | -5.439 | -0.28                  |
|                   | Stage B                    | 230963_at    | 0.74                  | 0.57                  | -6.280 | -0.12                  |
|                   | Stage A                    | 230963_at    | $1.37 \times 10^{-3}$ | $1.96 \times 10^{-4}$ | 0.359  | 0.92                   |
|                   | <i>ALCAM</i>               |              |                       |                       |        |                        |
|                   | Overall                    | 201951_at    | 0.069                 | 0.023                 | -3.922 | 0.56                   |
|                   | Stage B                    | 201951_at    | 0.70                  | 0.52                  | -6.234 | -0.18                  |
|                   | Stage A                    | 201951_at    | $1.36 \times 10^{-3}$ | $1.93 \times 10^{-4}$ | 0.372  | -1.18                  |

Continued

**Supplementary Table SII** *Continued*

| GWAS analysis     | Gene             | Probe_ID*   | Adj-P-Val             | P-value               | Beta                   | logFC                 |
|-------------------|------------------|-------------|-----------------------|-----------------------|------------------------|-----------------------|
| Stage B GWAS Loci | <i>NFE2L3</i>    |             |                       |                       |                        |                       |
|                   | See above        |             |                       |                       |                        |                       |
|                   | <i>NAALADL2</i>  |             |                       |                       |                        |                       |
|                   | Overall          | 1557998_at  | 0.64                  | 0.51                  | -6.272                 | -0.021                |
|                   | Stage B          | 1557998_at  | 0.75                  | 0.59                  | -6.294                 | 0.018                 |
|                   | Stage A          |             |                       |                       |                        |                       |
|                   | <i>CDKN2BAS1</i> |             |                       |                       |                        |                       |
|                   | Overall          | 1557998_at  | 0.64                  | 0.51                  | -6.272                 | -0.021                |
|                   | Stage B          | 1557998_at  | 0.75                  | 0.59                  | -6.292                 | 0.018                 |
|                   | Stage A          |             |                       |                       |                        |                       |
|                   | <i>FNI</i>       |             |                       |                       |                        |                       |
|                   | Overall          | 214701_s_at | 0.057                 | 0.017                 | -3.694                 | -0.32                 |
|                   | Stage B          | 214701_s_at | 0.015                 | $1.26 \times 10^{-3}$ | -1.312                 | 0.54                  |
|                   | Stage A          | 214701_s_at | 0.36                  | 0.22                  | -5.779                 | -0.060                |
|                   | <i>NR2C1</i>     |             |                       |                       |                        |                       |
|                   | Overall          | 204791_at   | 0.021                 | $4.65 \times 10^{-3}$ | -2.532                 | 0.62                  |
|                   | Stage B          | 204791_at   | 0.33                  | 0.15                  | -5.414                 | -0.33                 |
|                   | Stage A          | 204791_at   | $1.67 \times 10^{-3}$ | $2.62 \times 10^{-4}$ | 0.091                  | -1.06                 |
|                   | <i>C14orf132</i> |             |                       |                       |                        |                       |
|                   | Overall          | 231859_at   | $3.80 \times 10^{-5}$ | $3.36 \times 10^{-7}$ | 6.337                  | 0.82                  |
|                   | Stage B          | 231859_at   | $6.87 \times 10^{-5}$ | $1.79 \times 10^{-7}$ | 6.973                  | -0.98                 |
|                   | Stage A          | 231859_at   | 0.021                 | $6.73 \times 10^{-3}$ | -2.875                 | -0.53                 |
|                   | <i>FOXP2</i>     |             |                       |                       |                        |                       |
|                   | Overall          | 1555352_at  | 0.16                  | 0.071                 | -4.869                 | -0.011                |
|                   | Stage B          | 1555352_at  | 0.33                  | 0.15                  | -5.407                 | $6.79 \times 10^{-3}$ |
|                   | Stage A          | 1555352_at  | 0.19                  | 0.098                 | -5.163                 | $9.18 \times 10^{-3}$ |
|                   | <i>WNT4</i>      |             |                       |                       |                        |                       |
| See above         |                  |             |                       |                       |                        |                       |
| <i>ID4</i>        |                  |             |                       |                       |                        |                       |
| See above         |                  |             |                       |                       |                        |                       |
| <i>CDH20</i>      |                  |             |                       |                       |                        |                       |
| Overall           | 210913_at        | 0.46        | 0.31                  | -5.972                | $-1.65 \times 10^{-3}$ |                       |
| Stage B           | 210913_at        | 0.37        | 0.18                  | -5.543                | $2.64 \times 10^{-3}$  |                       |
| Stage A           |                  |             |                       |                       |                        |                       |
| <i>LAMC3</i>      |                  |             |                       |                       |                        |                       |
| See above         |                  |             |                       |                       |                        |                       |

Of the 77 endometriosis cases, 48 are Stage B cases and 27 are Stage A cases. The expression analysis results including all endometriosis cases, only Stage B and only Stage A cases are presented (Tamaresis et al., 2014). Adj-P-Val, Multiple-testing adjusted P-value (false discovery rate (FDR) corrected); P-value, nominal P-value; Beta, Beta-value, which is log-odds that the gene is differentially expressed, logFC: Log2-fold change in expression between cases and controls.

\*Multiple probes map to some of the genes. Of these, the probe with lowest P-value is reported.
